# Supplementary material
Source: publisher figshare collection journal article supplement (https://acs.figshare.com/ndownloader/files/5150872)

# Photoinduced Electron Transfer Reactivity of Aza[60]fullerene. Three Discrete Functionalization Pathways with a Single Substrate

Georgios C. Vougioukalakis, and Michael Orfanopoulos\*

*Department of Chemistry, University of Crete, 71409 Iraklion, Greece*

## Supporting Information

### Experimental Section

**General Considerations.**  $^1\text{H}$  NMR and  $^{13}\text{C}$  NMR spectra were recorded on a 500 MHz spectrometer. Chemical shifts are reported in ppm downfield from  $\text{Me}_4\text{Si}$ , by using the residual solvent peak as internal standard. FT-IR spectra were recorded on a fourier transform infrared spectrometer, using KBr pellets. UV-vis spectra were performed on a UV/Visible spectrometer. HPLC analyses have been carried out on  $\text{C}_{18}$  reverse phase columns with detection at 326 nm. A mixture of toluene/acetonitrile (55/45) was used as eluent at 1, or 4 ml/min flow rates. TLC was carried out on  $\text{SiO}_2$  (silica gel F<sub>254</sub>). Photochemical reactions were carried out by a 300-W xenon lamp as the light source, using a pyrex filter.

**Synthesis of aza[60]fullerene derivative 5.**  $(\text{C}_{59}\text{N})_2$  (30 mg, 0.02 mmoles) together with a 20-fold excess of toluene-*p*-sulfonic acid (44 mg, 0.4 mmoles) were dissolved in 18 ml of an ODCB/benzyltrimethylsilane mixture (9/1). The reaction mixture was irradiated for 40 min at 0 °C, while a constant, slow air stream was maintained over the solution (all reactions were monitored by HPLC). Consecutively, a 100-fold excess of triethylamine was added, the solvent was distilled from the reaction mixture under reduced pressure at 57 °C, and the remaining crude product was washed and centrifuged five times with acetonitrile HPLC grade. The isolated product was further purified by semi-preparative HPLC (4 ml/min flow rate) to afford 9.3 mg (yield: 28%) of **5** as a brown solid. m.p. > 360 °C; IR (KBr):  $\nu$  ( $\text{cm}^{-1}$ ) = 523, 700, 752, 800, 1023, 1093, 1261, 1421, 1458, 1497, 1550, 1584, 2845, 2913, 2957;

UV-vis ( $\text{CHCl}_3$ ):  $\lambda_{\text{max}}$  (nm)= 260, 322, 438, 602, 728; MS (FAB):  $m/z$  830 ( $\text{MH}^+$ ), 722 ( $\text{C}_{59}\text{N}^+$ );  $^1\text{H}$  NMR (500 MHz,  $\text{CS}_2\text{-CDCl}_3$ ):  $\delta$  7.85 (d,  $J$ = 7.5 Hz, 2H), 7.54 (t,  $J$ = 7.5 Hz, 2H), 7.45 (t,  $J$ = 7.5 Hz, 1H), 5.98 (s, 2H);  $^{13}\text{C}$  NMR (125 MHz,  $\text{CS}_2\text{-CDCl}_3$ ):  $\delta$  154.32, 147.70, 147.48, 147.44, 147.42, 146.51, 146.48, 146.34, 146.04, 146.02, 145.88, 145.43, 145.22, 145.13, 144.61, 144.36, 143.74, 143.40, 143.25, 142.73, 142.63, 142.01, 141.88, 141.65, 141.44, 140.01, 137.67, 137.38, 136.06, 129.27, 128.73, 125.76, 69.04, 30.45.

**Synthesis of aza[60]fullerene derivative 7.** ( $\text{C}_{59}\text{N}$ )<sub>2</sub> (30 mg, 0.02 mmol) together with a 20-fold excess of toluene-*p*-sulfonic acid (44 mg, 0.4 mmol) were dissolved in 18 ml of an ODCB/benzyltrimethylsilane mixture (9/1). The reaction mixture was stirred at 150 °C for 1.5 hours, while a constant, slow air stream was maintained over the solution. After the reaction was cooled down to room temperature, a 100-fold excess of triethylamine was added, the solvent was distilled from the reaction mixture under reduced pressure at 57 °C, and the remaining crude product was washed and centrifuged five times with acetonitrile HPLC grade. The isolated product was further purified by semi-preparative HPLC (4 ml/min flow rate) to afford 23.0 mg (yield: 65%) of **7** as a brown solid. m.p. > 360 °C; IR (KBr):  $\nu$  ( $\text{cm}^{-1}$ )= 523, 693, 718, 752, 850, 897, 965, 1088, 1146, 1180, 1205, 1244, 1314, 1409, 1420, 1504, 1546, 1605; UV-vis ( $\text{CHCl}_3$ ):  $\lambda_{\text{max}}$  (nm)= 256, 320, 446, 600, 730, 818; MS (FAB):  $m/z$  886 ( $\text{MH}^+$ ), 722 ( $\text{C}_{59}\text{N}^+$ );  $^1\text{H}$  NMR (500 MHz,  $\text{CS}_2\text{-CDCl}_3$ ):  $\delta$  8.70 (d,  $J$ = 8.0 Hz, 2H), 7.52 (d,  $J$ = 8.0 Hz, 2H), 2.41 (s, 2H), 0.24 (s, 9H);  $^{13}\text{C}$  NMR (125 MHz,  $\text{CS}_2\text{-CDCl}_3$ ):  $\delta$  155.09, 149.69, 148.44, 148.29, 148.25, 147.92, 147.90, 147.25, 147.04, 146.87, 146.52, 146.48, 146.30, 145.68, 145.21, 144.95, 144.65, 143.78, 143.39, 143.03, 142.72, 142.45, 142.21, 142.06, 141.63, 141.52, 140.42, 138.22, 137.33, 133.60, 130.04, 127.84, 124.81, 83.51, 28.12, -1.10.

**Synthesis of aza[60]fullerene derivative 6.** ( $\text{C}_{59}\text{N}$ )<sub>2</sub> (30 mg, 0.02 mmol) were dissolved in 18 ml of a thoroughly degassed (6 vacuum-argon cycles) ODCB/benzyltrimethylsilane mixture (9/1). The reaction mixture was stirred at 160 °C for 4 hours under argon. The solvent was distilled from the reaction mixture under reduced pressure at 57 °C, and the product was purified by semipreparative HPLC (4 ml/min flow rate) to afford **6** as a brown solid (yield: < 8%). Unfortunately, due to the very low yield of these free radical reactions, we did not manage to purify enough quantity of **6** for characterization with  $^{13}\text{C}$  NMR and FT-IR; however, all other data

support the proposed structure. m.p. > 360 °C; UV-vis (CHCl<sub>3</sub>):  $\lambda_{\text{max}}$  (nm)= 255, 322, 446, 601, 729, 816; MS (MALDI):  $m/z$  813 (M<sup>+</sup>), 722 (C<sub>59</sub>N<sup>+</sup>); <sup>1</sup>H NMR (500 MHz, CS<sub>2</sub>-CDCl<sub>3</sub>):  $\delta$  7.86 (d,  $J$ = 7.5 Hz, 2H), 7.55 (t,  $J$ = 7.5 Hz, 2H), 7.46 (t,  $J$ = 7.5 Hz, 1H), 5.99 (s, 2H). The same adduct was also derived by photochemical treatment of (C<sub>59</sub>N)<sub>2</sub> in a ODCB/benzyltrimethylsilane mixture (9/1) under argon at 0 °C.

## Spectral Data

### A) Aza[60]fullerene adduct 5

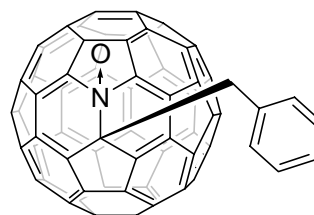

#### 1) FAB-MS, (MH<sup>+</sup>) = 830

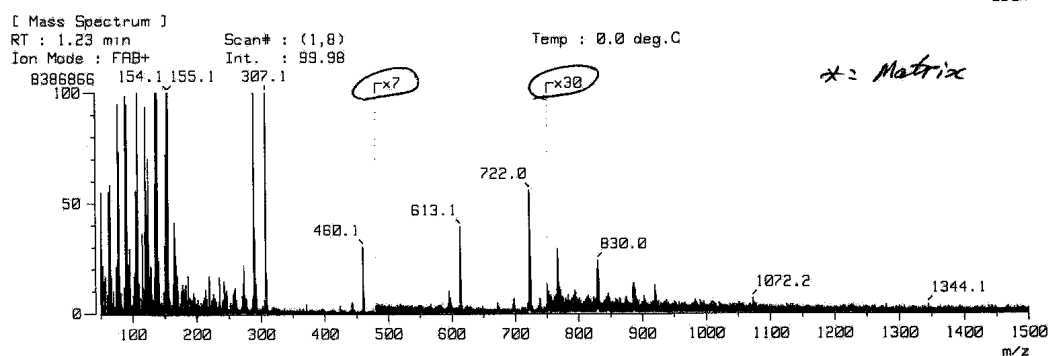

#### 2) <sup>1</sup>H NMR (500 MHz, CDCl<sub>3</sub>-CS<sub>2</sub>)

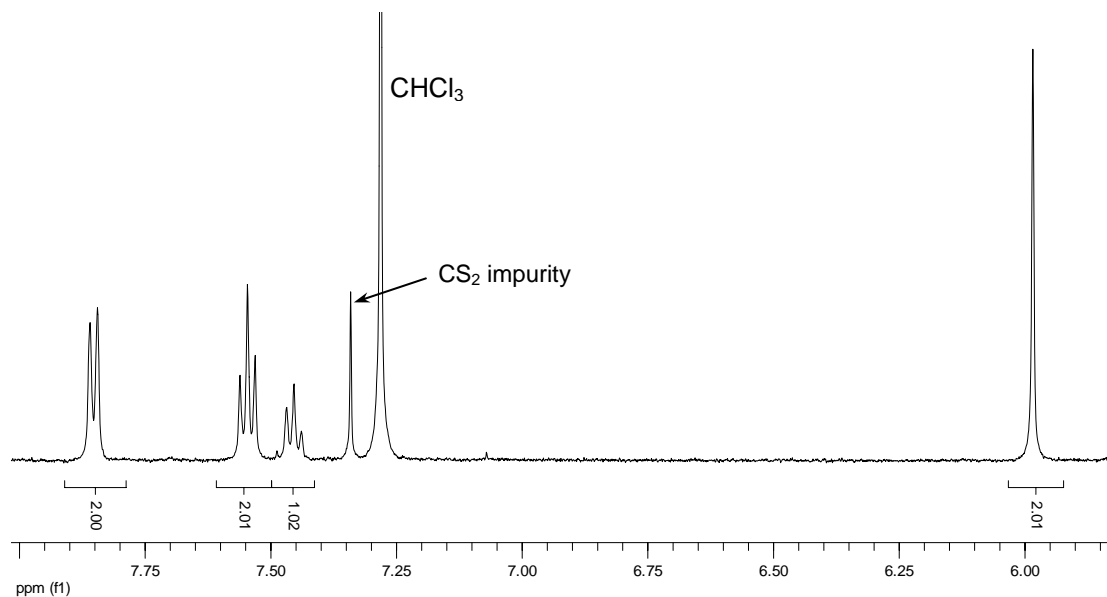

3)  $^{13}\text{C}$  NMR (125 MHz,  $\text{CDCl}_3\text{-CS}_2$ )

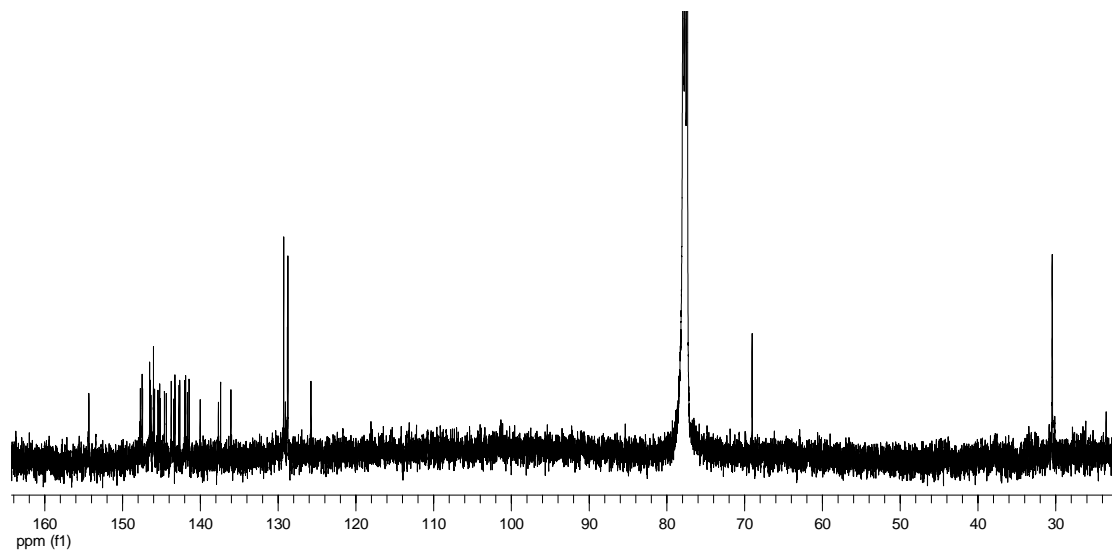

4) FT-IR

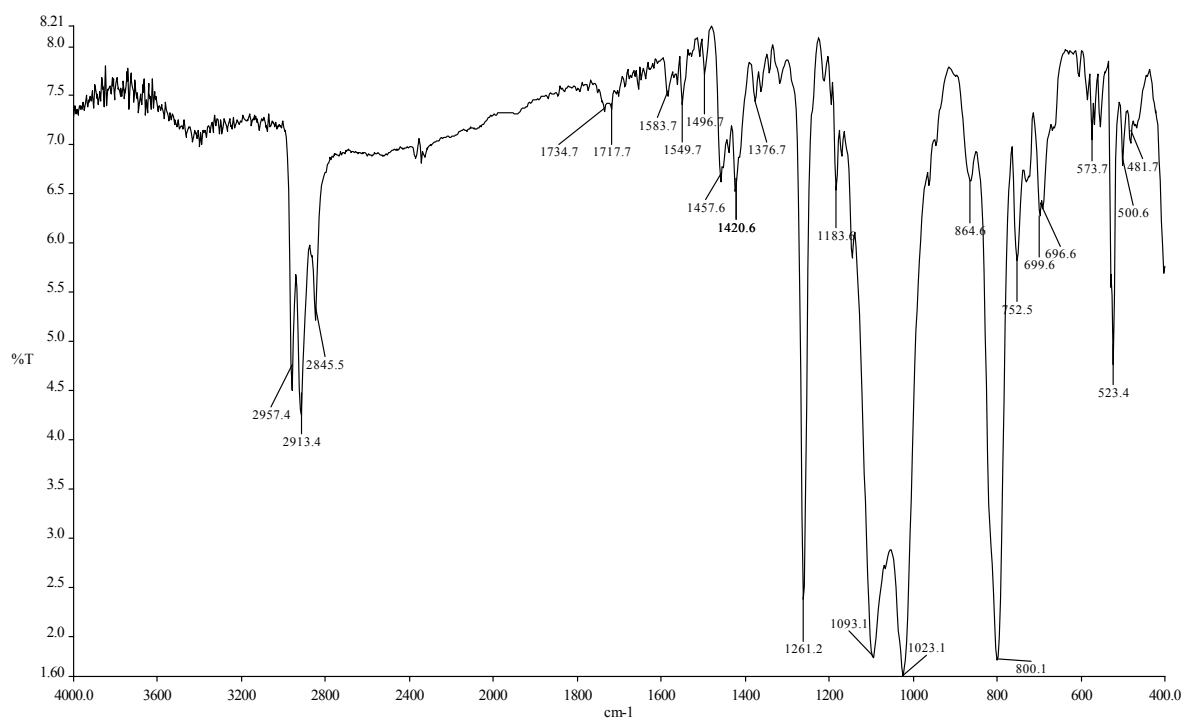

## 5) UV-vis

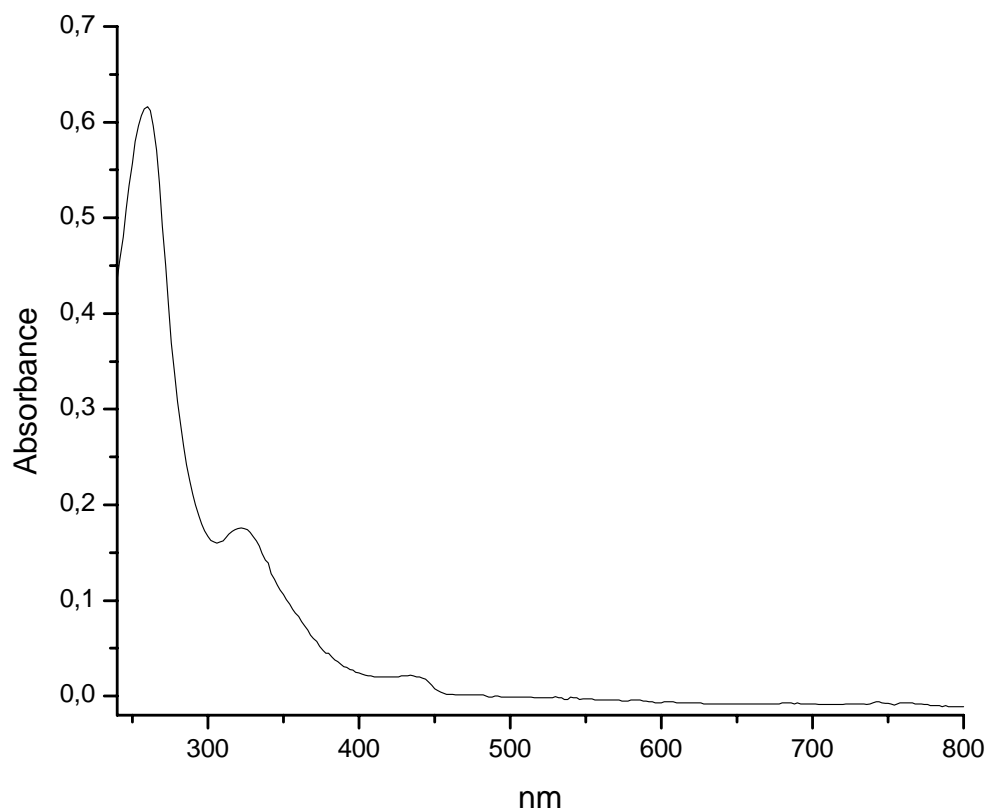

## B) Aza[60]fullerene adduct 7

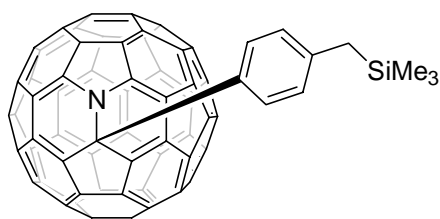

7

### 1) FAB-MS, (MH<sup>+</sup>) = 886

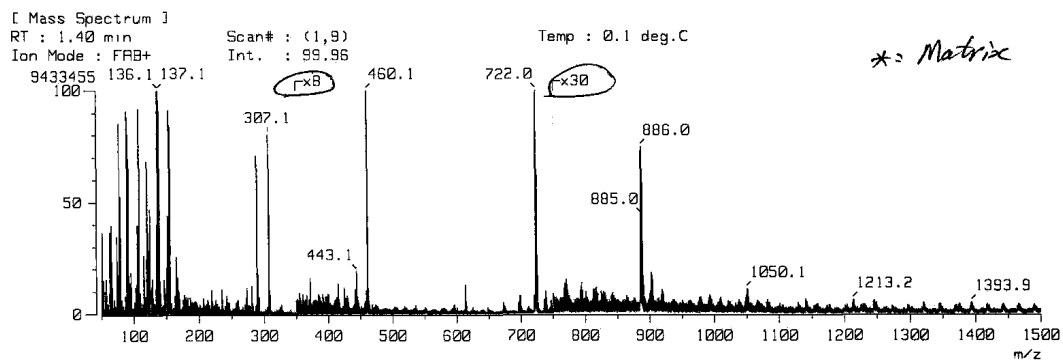

2)  $^1\text{H}$  NMR (500 MHz,  $\text{CDCl}_3\text{-CS}_2$ )

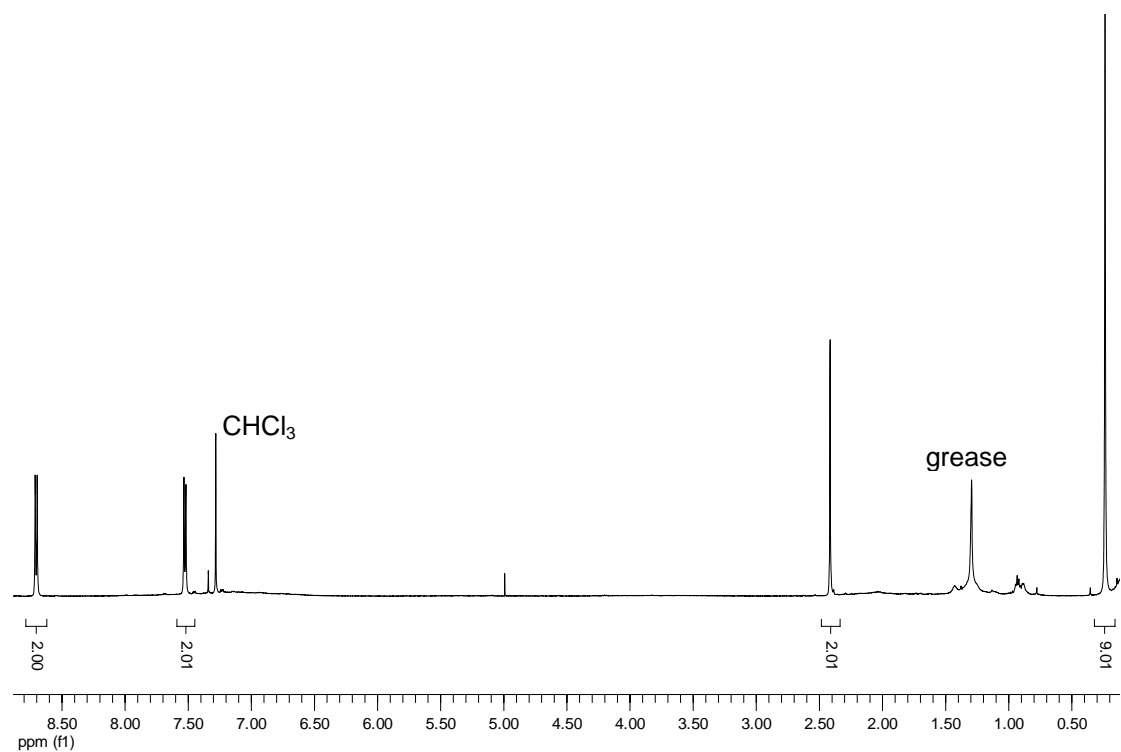

3)  $^{13}\text{C}$  NMR (125 MHz,  $\text{CDCl}_3\text{-CS}_2$ )

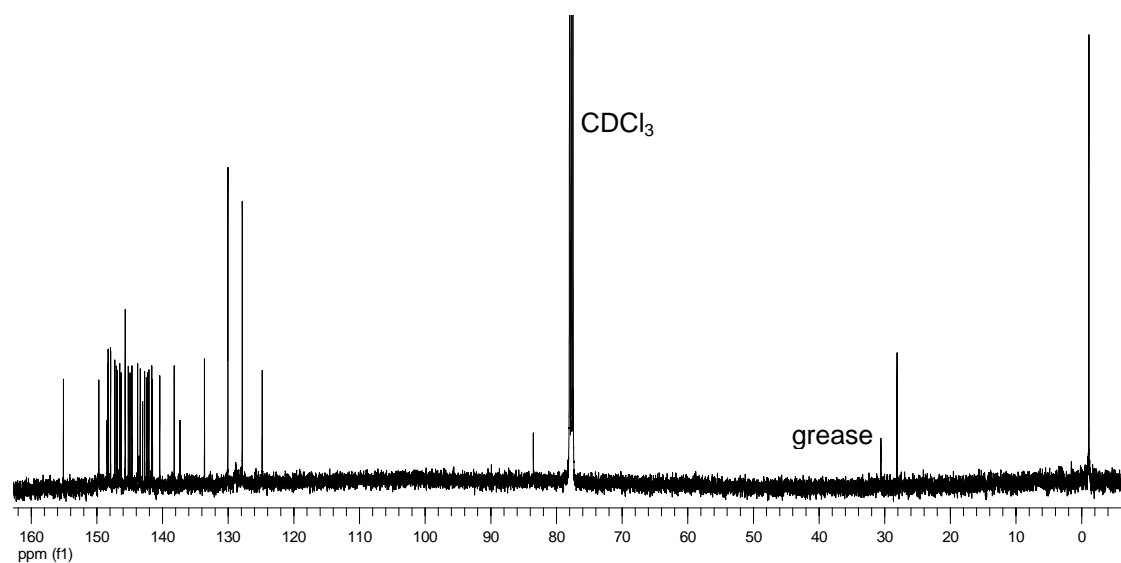

#### 4) FT-IR

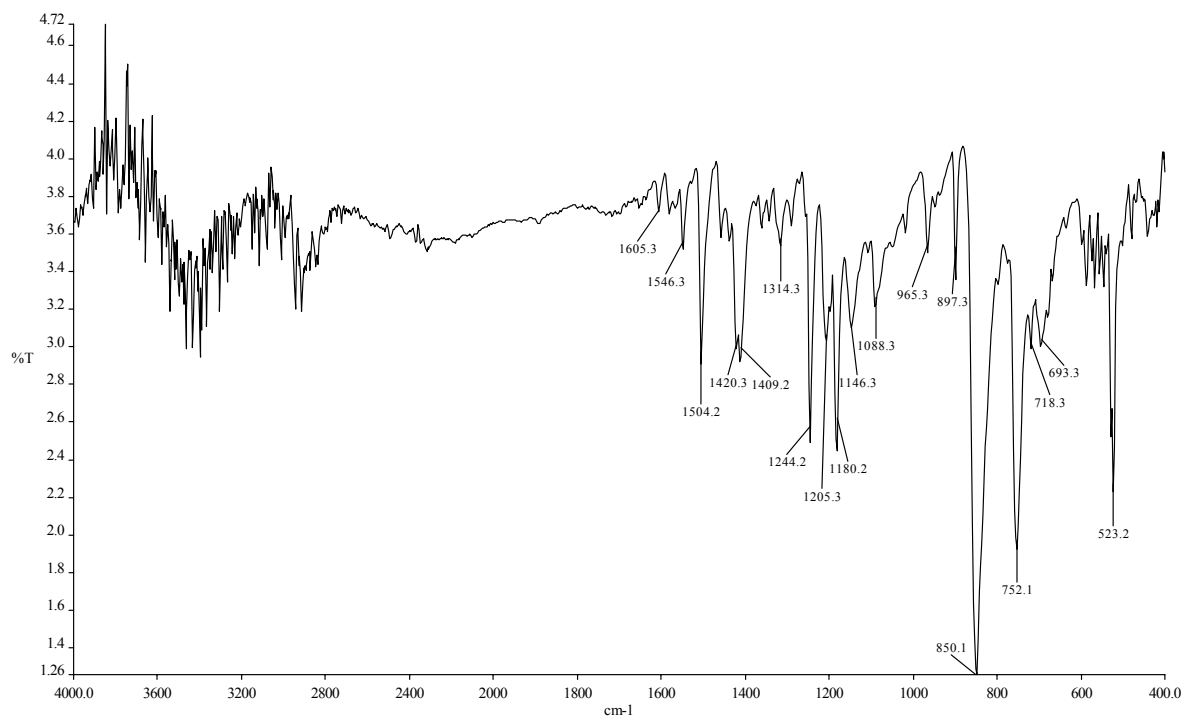

#### 5) UV-vis

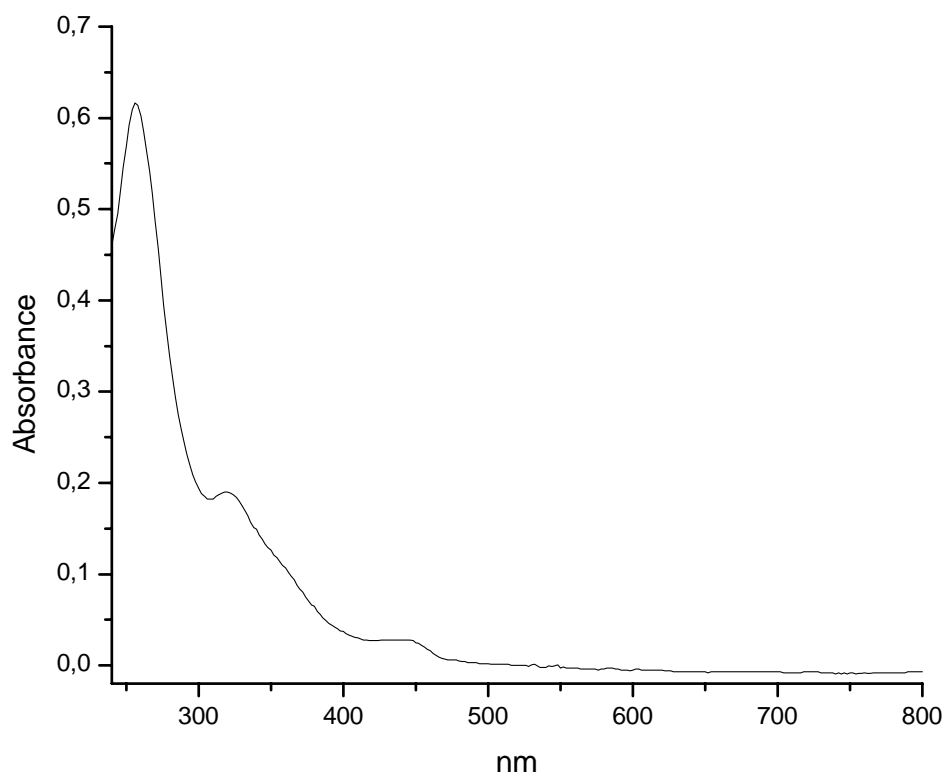

**C) Aza[60]fullerene adduct 6**

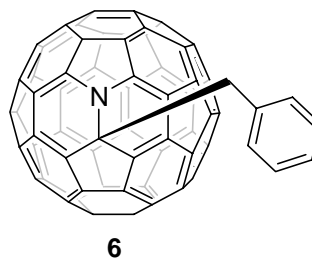

**1) MALDI, ( $M^+$ ) = 813**

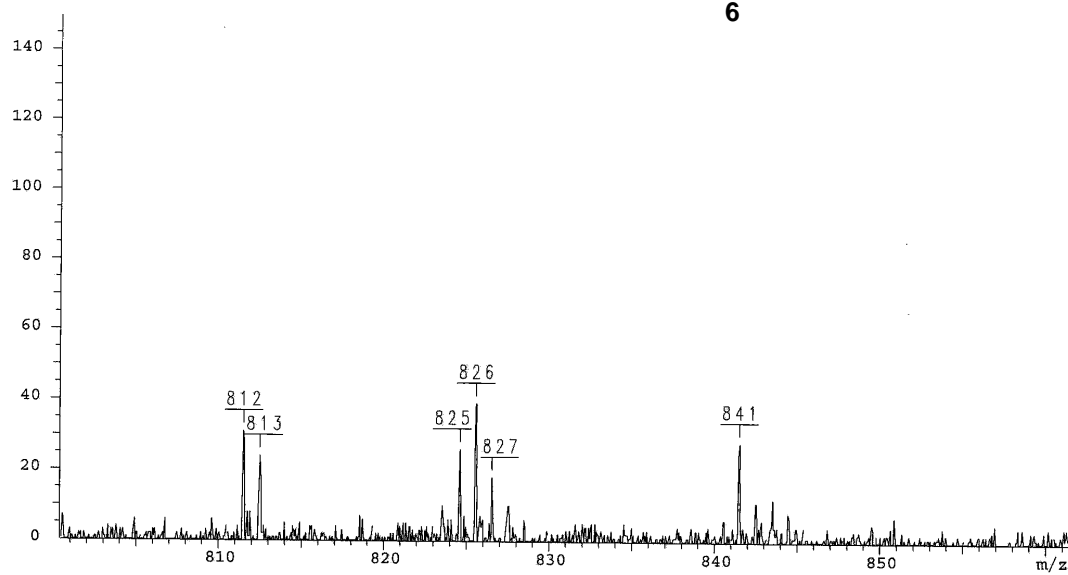

**2)  $^1\text{H}$  NMR (500 MHz,  $\text{CDCl}_3\text{-CS}_2$ )**

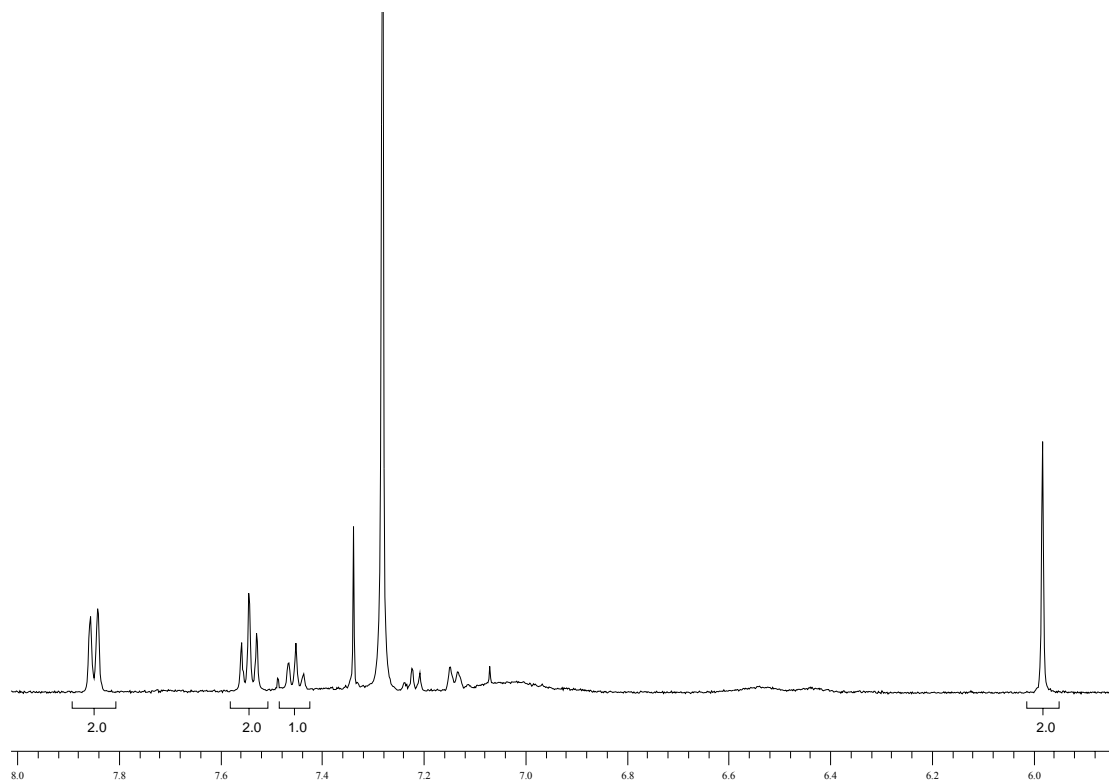



### 3) UV-vis

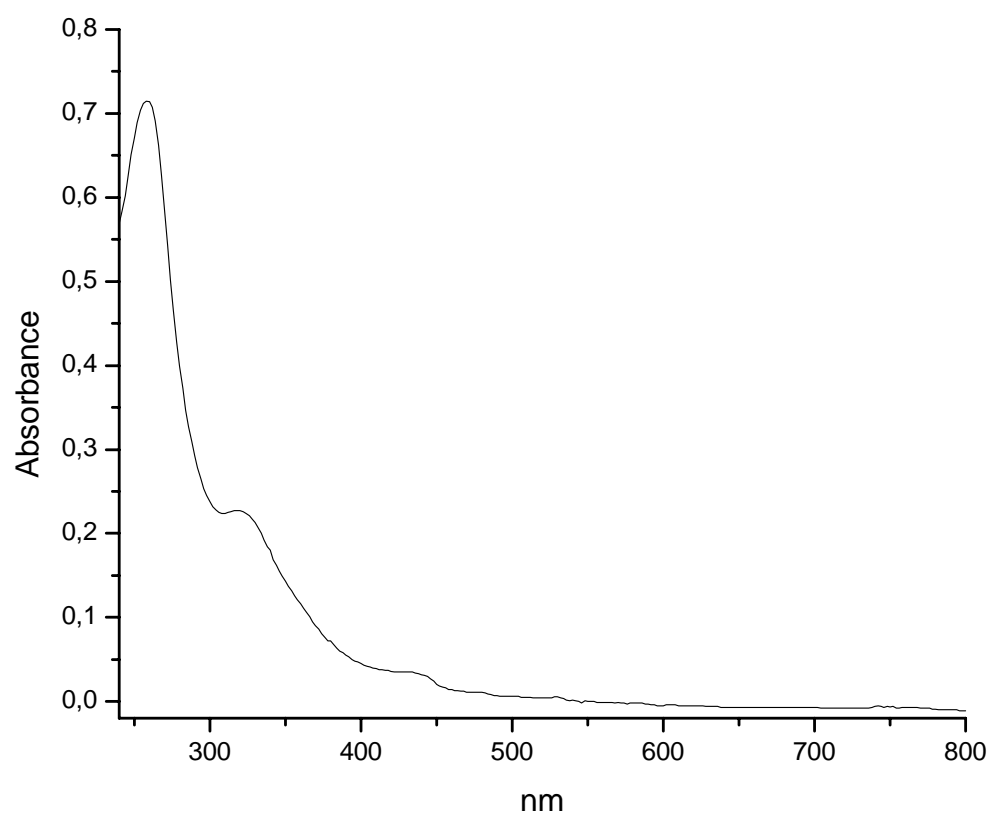

Supplement: Supplementary file 1 [file 5150872]
